# Supplementary material for: First-principles study of CO2 hydrogenation to formic acid on single-atom catalysts supported on SiO2
Source: Royal Society of Chemistry journal article supplement (doi:10.1039/d2cp02225g), 2022-01-01
Supplement: d2cp02225g1.pdf [file d2cp02225g1.pdf]

# First-Principles Study of CO<sub>2</sub> hydrogenation to formic acid on single-atom catalysts supported on SiO<sub>2</sub>

*Jikai Sun<sup>a</sup>, Shuchao Jiang<sup>a</sup>, Yanliang Zhao<sup>a</sup>, Honglei Wang<sup>a</sup>, Dong Zhai<sup>a</sup>, Weiqiao Deng<sup>\*,a,b</sup>, and  
Lei Sun<sup>\*,a</sup>*

<sup>a</sup>Institute of Molecular Sciences and Engineering, Institute of Frontier and Interdisciplinary Science, Shandong University, Qingdao 266237, R. P. China. E-mail: slei@sdu.edu.cn & dengwq@sdu.edu.cn

<sup>b</sup>State Key Laboratory of Molecular Reaction Dynamics, Dalian National Laboratory for Clean Energy, Dalian Institute of Chemical Physics, Chinese Academy of Sciences, Dalian 116023, R. P. China

**Table S1** Energy difference of different convergence criteria.  $\Delta E = E(0.01) - E(0.02)$ 

| Model                                      | $\Delta E$ (kcal/mol) |
|--------------------------------------------|-----------------------|
| <u>Pt@SiO<sub>2</sub></u>                  | -0.0004612            |
| <u>Ir@SiO<sub>2</sub>-CO<sub>2</sub></u>   | -0.0002306            |
| <u>Au@SiO<sub>2</sub>-H<sub>2</sub></u>    | -0.005765             |
| <u>Rh@SiO<sub>2</sub>-H<sub>2</sub></u>    | -0.0004612            |
| <u>Ru@SiO<sub>2</sub>-H<sub>2</sub></u>    | -0.3601972            |
| <u>Ru@SiO<sub>2</sub>-2H</u>               | -0.0163726            |
| <u>Os@SiO<sub>2</sub>-H-CO<sub>2</sub></u> | -0.0108382            |
| <u>Pd@SiO<sub>2</sub>-H-CO<sub>2</sub></u> | -0.0445058            |
| <u>Ru@SiO<sub>2</sub>-H-CO<sub>2</sub></u> | -0.0915482            |
| <u>Ru@SiO<sub>2</sub>-OCHO-TS</u>          | -0.1219874            |
| <u>Ru@SiO<sub>2</sub>-OCHO</u>             | -0.0285944            |

**Table S2** Ideal value of  $\langle S^2 \rangle$ .  $\langle S^2 \rangle = S \times (S + 1)$ , where S denoted spin quantum number.

|    | <u>M@SiO<sub>2</sub></u> | <u>M@SiO<sub>2</sub>-CO<sub>2</sub></u> | <u>M@SiO<sub>2</sub>-H<sub>2</sub></u> | <u>M@SiO<sub>2</sub>-H</u> | <u>M@SiO<sub>2</sub>-H-CO<sub>2</sub></u> |
|----|--------------------------|-----------------------------------------|----------------------------------------|----------------------------|-------------------------------------------|
| Ru | 3.75                     | 3.75                                    | 3.75                                   | 2.00                       | 2.00                                      |
| Rh | 0.00                     | 0.00                                    | 2.00                                   | 0.75                       | 0.75                                      |
| Pd | 0.75                     | 0.75                                    | 0.75                                   | 2.00                       | 0.00                                      |
| Ag | 2.00                     | -                                       | 2.00                                   | -                          | -                                         |
| Os | 3.75                     | 0.75                                    | 0.75                                   | 2.00                       | 2.00                                      |
| Ir | 2.00                     | 2.00                                    | 2.00                                   | 3.75                       | 0.75                                      |
| Pt | 0.75                     | 0.75                                    | 0.75                                   | 2.00                       | 0.00                                      |
| Au | 2.00                     | 0.00                                    | 0.00                                   | 0.75                       | 0.75                                      |

The '-' sign denoted not calculated.

**Table S3** Surface energy ( $E_{\text{surf}}$ ) of different surface of  $\beta$ -cristobalite.

| Surface | $E_{\text{surf}}$ (J/m <sup>2</sup> ) |
|---------|---------------------------------------|
| 100     | 2.77                                  |
| 101     | 2.13                                  |
| 110     | 2.35                                  |
| 111     | 1.97                                  |

**Table S4** Energy of H<sub>2</sub> adsorption and dissociation (unit: kcal/mol).

| Metal | E <sub>ad</sub> | Barrier | E <sub>r</sub> |
|-------|-----------------|---------|----------------|
| Rh    | -18.79          | 28.43   | -3.79          |
| Pd    | -14.82          | 13.19   | -21.37         |
| Pt    | -25.1           | 18.45   | -13.48         |
| Au    | -20.31          | 10.44   | -38.82         |

**Table S5** Energy of CO<sub>2</sub> hydrogenation (unit: kcal/mol).

| Metal | Barrier | E <sub>r</sub> |
|-------|---------|----------------|
| Ru    | 23.93   | 6.42           |
| Rh    | 31.54   | 14.16          |
| Pd    | 31.91   | 14.25          |
| Os    | 24.93   | -2.81          |
| Ir    | 30.17   | 2.66           |
| Pt    | 31.93   | 8.13           |
| Au    | 56.95   | 23.28          |

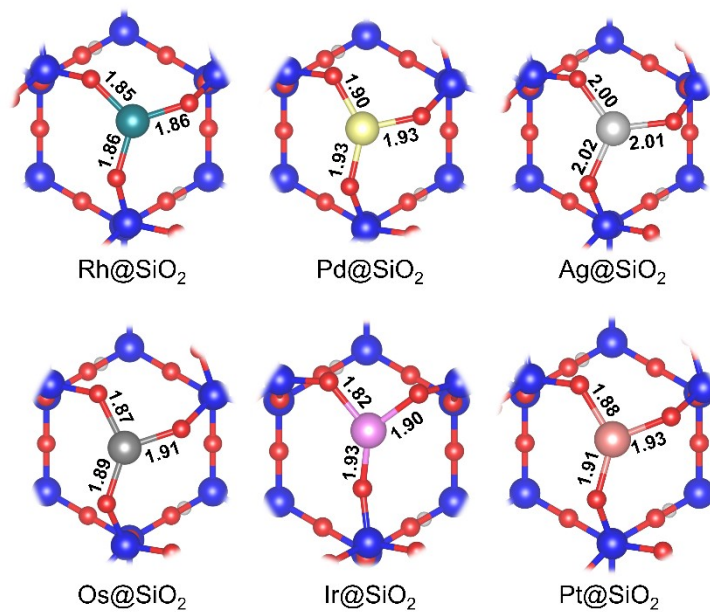

**Figure S1** Optimized structure of singly dispersed metal atoms anchored on inert support  $\text{SiO}_2$ .

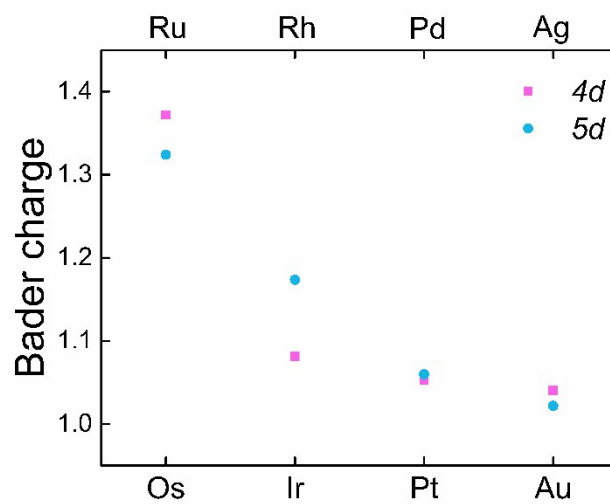

**Figure S2** Bader charge of eight noble metals of  $\text{M@SiO}_2$ .

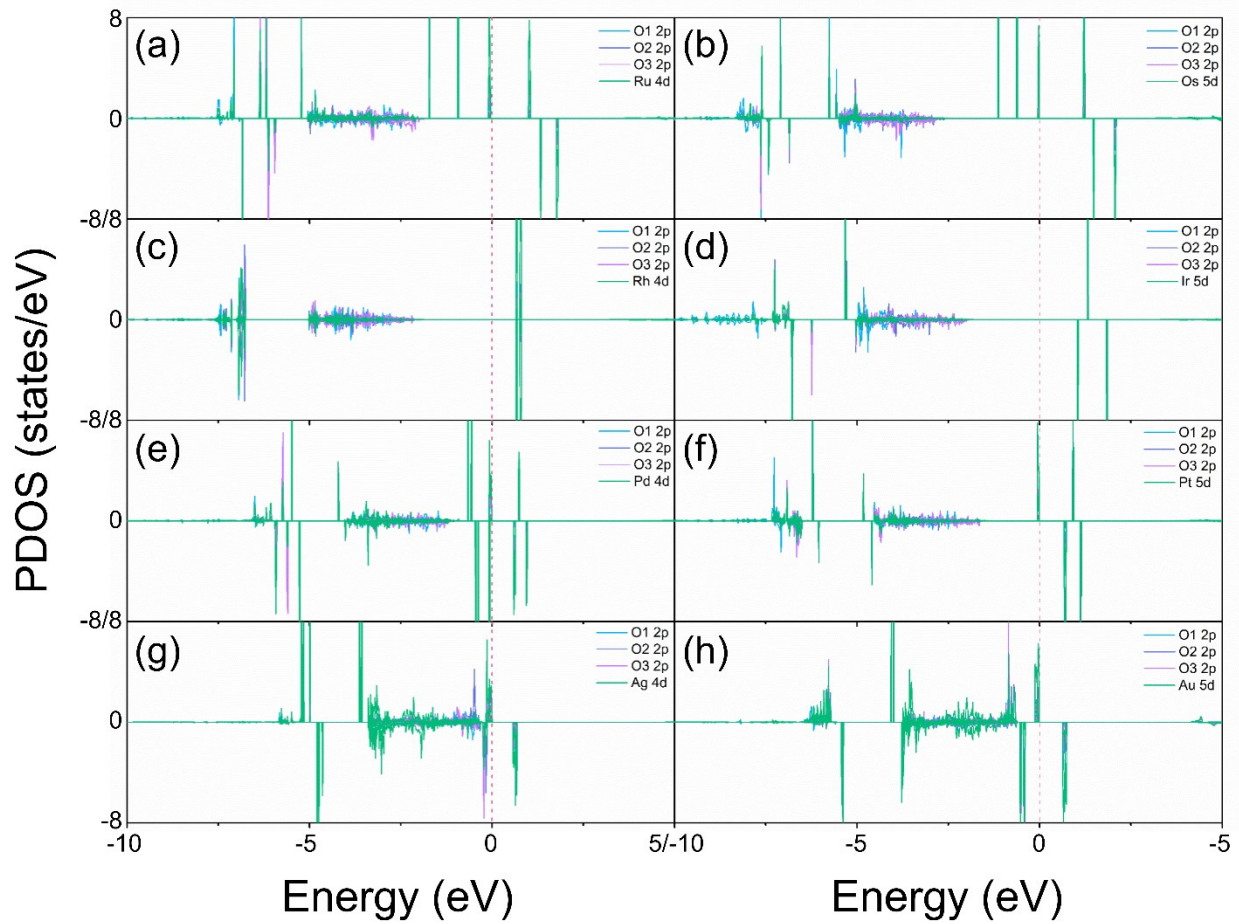

**Figure S3** PDOS of p-orbitals of metal-coordinated oxygen and d-orbitals of the metal atom of eight  $M@SiO_2$ . The Fermi level is set to zero.

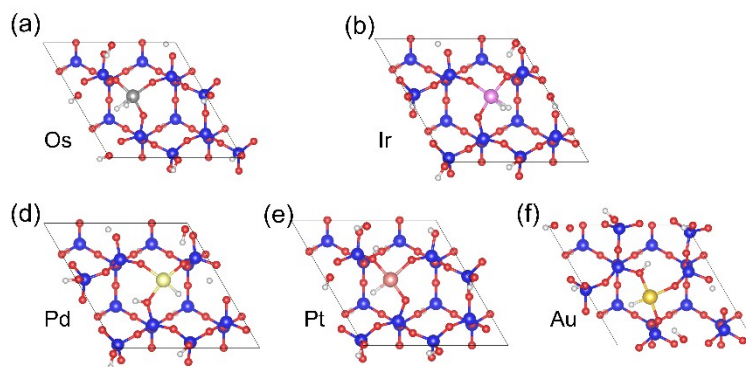

**Figure S4** Optimized structure of two hydrogen atoms adsorbed on  $M@SiO_2$ .

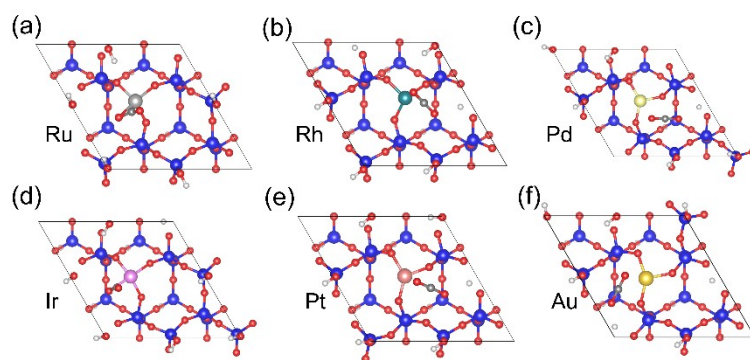

**Figure S5** Optimized structure of CO<sub>2</sub> molecule adsorbed on M@SiO<sub>2</sub>.

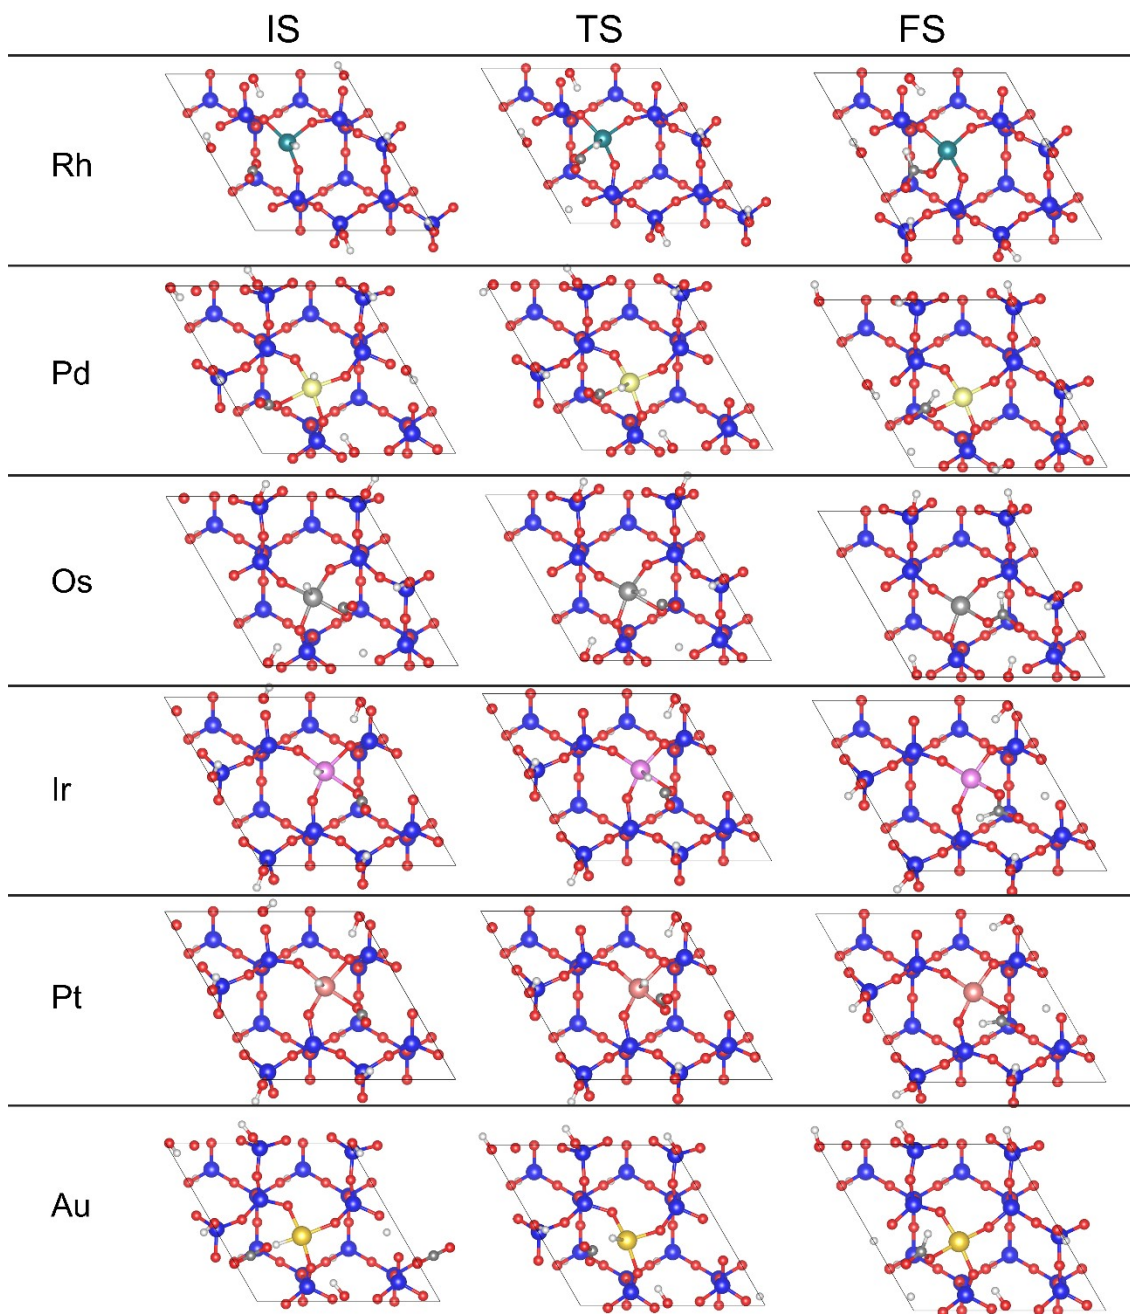

**Figure S6** Structure of CO<sub>2</sub> hydrogenation to formate, including initial state (IS), transition state (TS), and final state (FS).



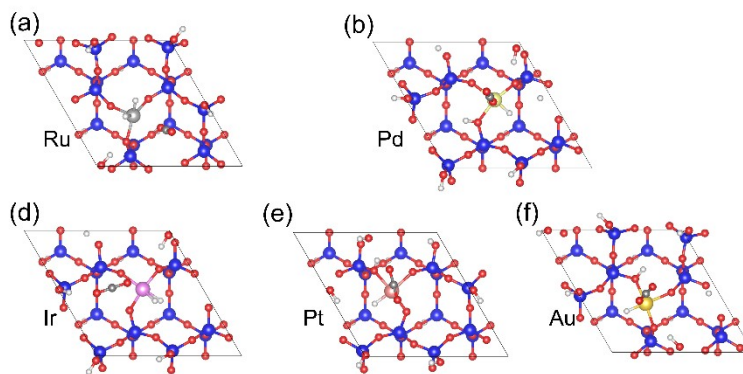

**Figure S7** Optimized structure of CO<sub>2</sub> molecule adsorbed on M@SiO<sub>2</sub>-2H.

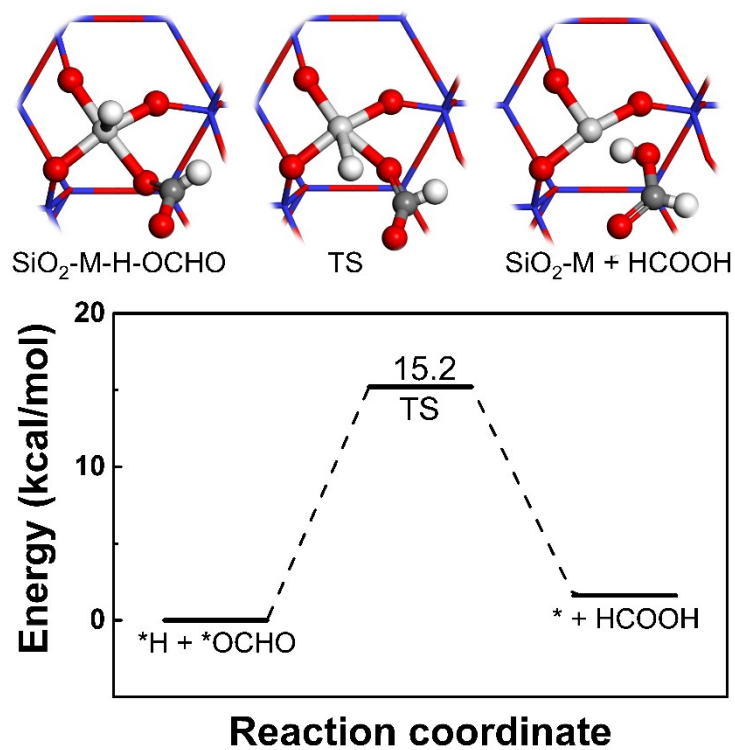

**Figure S8** Energy profile of \*HCOO hydrogenation to formic acid on Ru@SiO<sub>2</sub> and corresponding structures, including initial state (IS), transition state (TS), and final state (FS).

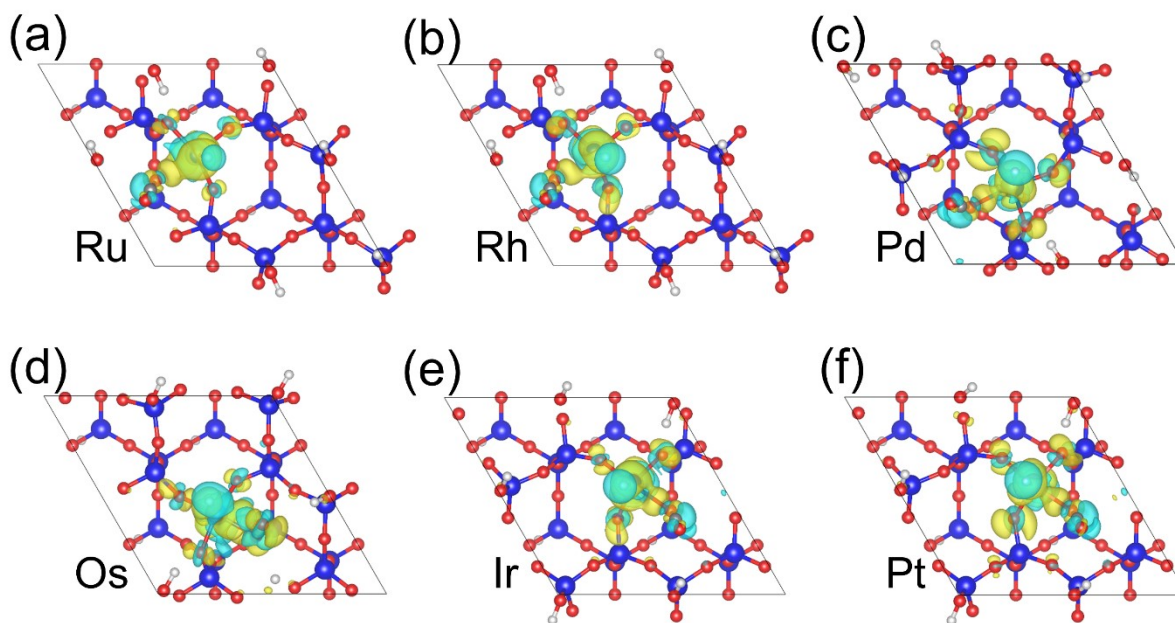

**Figure S9** Charge density difference between H and CO<sub>2</sub> and Ru@SiO<sub>2</sub> (a), Rh@SiO<sub>2</sub> (b), Pd@SiO<sub>2</sub> (c), Os@SiO<sub>2</sub> (d), Ir@SiO<sub>2</sub> (e), and Pt@SiO<sub>2</sub> (f), respectively. The charge density difference was calculated by the pattern of  $\text{Charge}(\text{M@SiO}_2\text{-H-CO}_2) - \text{Charge}(\text{M@SiO}_2) - \text{Charge}(\text{H and CO}_2)$ . Isosurface level is  $0.0025 \text{ e Bohr}^{-3}$ . The yellow and green colors represent electron accumulation and depletion, respectively.

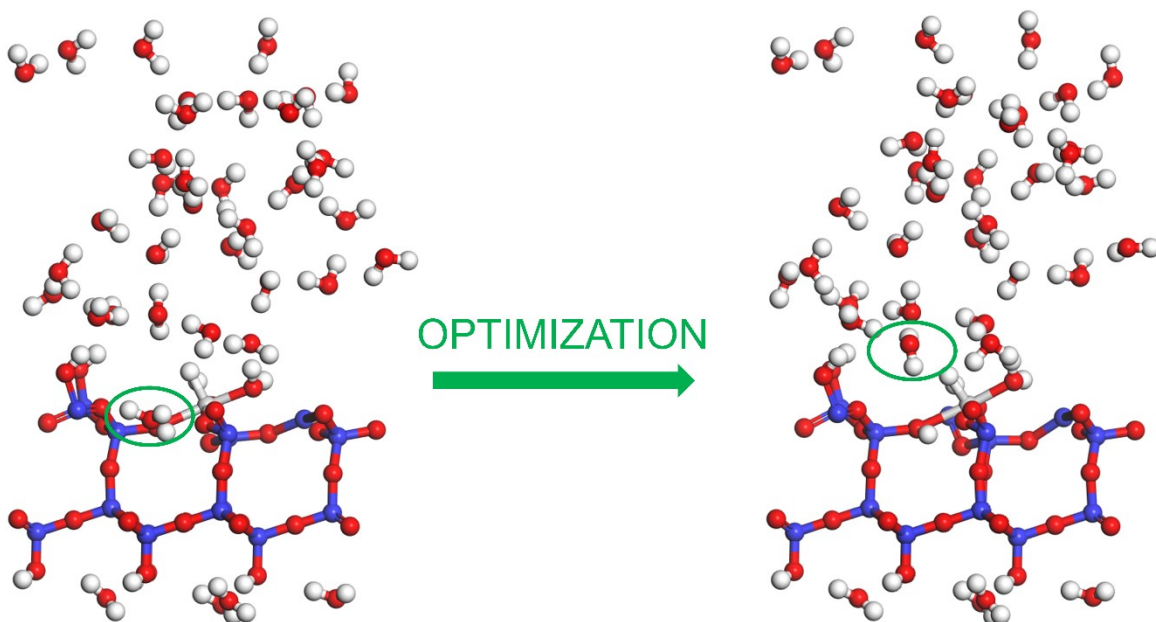

**Figure S10** Water adsorption configurations before and after optimization.

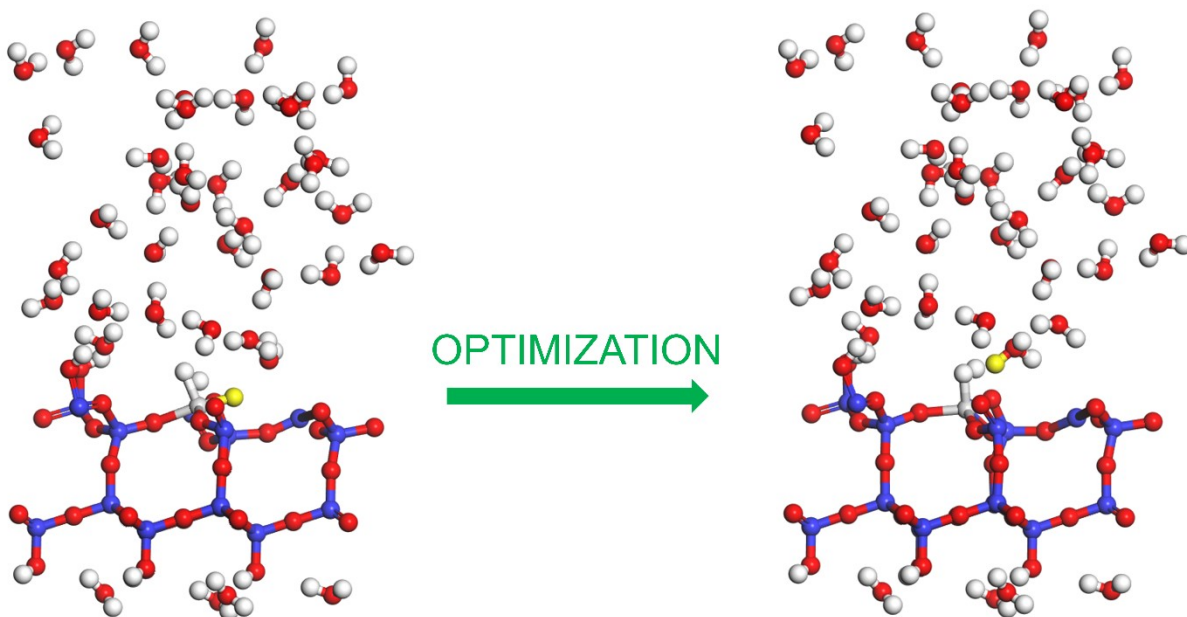

**Figure S11** Configurations of Ru@SiO<sub>2</sub>-2H before and after optimization.

Coordinates:

73

Ru@SiO2

|    |           |          |           |
|----|-----------|----------|-----------|
| Si | 5.291085  | 9.062113 | 9.287902  |
| Si | 2.637872  | 1.523037 | 5.062270  |
| Si | 2.546461  | 1.440962 | 8.287803  |
| Si | 0.000053  | 3.045983 | 3.985274  |
| Si | 5.298813  | 0.325028 | 9.238218  |
| Si | 7.913722  | 1.523037 | 5.062270  |
| Si | 8.053050  | 1.715833 | 8.271247  |
| Si | 5.275903  | 3.045983 | 3.985274  |
| Si | -2.448154 | 4.797381 | 9.281199  |
| Si | -0.000053 | 6.092057 | 5.062270  |
| Si | 0.021881  | 6.578857 | 8.211360  |
| Si | -2.637872 | 7.615002 | 3.985274  |
| Si | 5.275797  | 6.092057 | 5.062270  |
| Si | 5.289093  | 6.048809 | 8.294136  |
| Si | 2.637978  | 7.615002 | 3.985274  |
| O  | 0.179705  | 0.034230 | 10.915421 |
| O  | 2.671002  | 1.534867 | 6.678614  |
| O  | 0.000053  | 3.045983 | 2.370024  |
| O  | 2.637925  | 0.000000 | 4.523772  |
| O  | -2.637925 | 9.138040 | 4.523772  |
| O  | 1.952375  | 2.831460 | 8.906308  |
| O  | 4.020713  | 1.293509 | 8.953711  |
| O  | 1.318962  | 2.284510 | 4.523772  |
| O  | -1.318962 | 2.284510 | 4.523772  |

O 9.232738 2.284510 4.523772  
O 1.491228 0.267508 8.672683  
O 0.120176 9.040304 10.818191  
O 7.919852 1.521648 6.674094  
O 5.275903 3.045983 2.370024  
O 7.913774 0.000000 4.523772  
O 2.637925 9.138040 4.523772  
O 8.186584 3.307249 8.606687  
O 9.388925 0.939786 8.784210  
O 6.594812 2.284510 4.523772  
O 3.956887 2.284510 4.523772  
O 6.704719 1.086308 8.944979  
O -2.494941 4.686852 10.917069  
O 0.021659 6.054574 6.678068  
O -2.637872 7.615002 2.370024  
O 0.000000 4.569020 4.523772  
O -0.284309 8.173724 8.266099  
O 1.525939 6.430648 8.872843  
O -1.318962 6.853530 4.523772  
O -3.956887 6.853530 4.523772  
O 6.594812 6.853530 4.523772  
O -1.086069 5.659919 8.988136  
O 5.223598 6.065162 6.672819  
O 2.637978 7.615002 2.370024  
O 5.275849 4.569020 4.523772  
O 4.942895 7.553484 8.811562  
O 6.805634 5.594942 8.706984

|    |           |           |           |
|----|-----------|-----------|-----------|
| O  | 3.956887  | 6.853530  | 4.523772  |
| O  | 1.318963  | 6.853530  | 4.523772  |
| O  | 4.232547  | 5.017694  | 8.985062  |
| Ru | 2.309101  | 4.679344  | 8.865439  |
| H  | 9.920052  | 0.031823  | 11.445251 |
| H  | -0.906338 | 2.522739  | 2.000066  |
| H  | -0.668814 | 8.644214  | 11.220270 |
| H  | 4.369512  | 2.522739  | 2.000066  |
| H  | 7.258019  | 4.299435  | 11.306645 |
| H  | -3.544263 | 7.091758  | 2.000066  |
| H  | 1.731587  | 7.091758  | 2.000066  |
| O  | 4.113075  | 10.077826 | 8.784210  |
| O  | 6.767077  | 9.405547  | 8.672683  |
| O  | 5.455554  | 9.172270  | 10.915421 |
| O  | 4.991540  | -0.964315 | 8.266099  |
| O  | 5.396026  | -0.097735 | 10.818191 |
| O  | -2.365116 | 3.307249  | 8.606687  |
| O  | -3.746066 | 5.594942  | 8.706984  |
| H  | -0.631648 | 0.031823  | 11.445251 |
| H  | -3.293680 | 4.299435  | 11.306645 |
| H  | 4.644202  | 9.169863  | 11.445251 |
| H  | 4.607036  | -0.493826 | 11.220270 |

74

Ru@SiO2-H2

|    |          |          |          |
|----|----------|----------|----------|
| Si | 5.272873 | 9.003213 | 9.274261 |
| Si | 2.637872 | 1.523037 | 5.062270 |

|    |           |          |           |
|----|-----------|----------|-----------|
| Si | 2.509106  | 1.427073 | 8.282057  |
| Si | 0.000053  | 3.045983 | 3.985274  |
| Si | 5.241642  | 0.293340 | 9.207611  |
| Si | 7.913722  | 1.523037 | 5.062270  |
| Si | 8.022676  | 1.663419 | 8.275829  |
| Si | 5.275903  | 3.045983 | 3.985274  |
| Si | -2.604173 | 4.743137 | 9.283559  |
| Si | -0.000053 | 6.092057 | 5.062270  |
| Si | -0.141737 | 6.583446 | 8.192525  |
| Si | -2.637872 | 7.615002 | 3.985274  |
| Si | 5.275797  | 6.092057 | 5.062270  |
| Si | 5.103673  | 5.968779 | 8.282769  |
| Si | 2.637978  | 7.615002 | 3.985274  |
| O  | 0.205049  | 0.030438 | 10.896035 |
| O  | 2.675537  | 1.527555 | 6.678923  |
| O  | 0.000053  | 3.045983 | 2.370024  |
| O  | 2.637925  | 0.000000 | 4.523772  |
| O  | -2.637925 | 9.138040 | 4.523772  |
| O  | 1.884921  | 2.784341 | 8.912205  |
| O  | 3.966988  | 1.281204 | 8.993694  |
| O  | 1.318962  | 2.284510 | 4.523772  |
| O  | -1.318962 | 2.284510 | 4.523772  |
| O  | 9.232738  | 2.284510 | 4.523772  |
| O  | 1.449656  | 0.222565 | 8.611572  |
| O  | 0.078510  | 8.951926 | 10.773777 |
| O  | 7.916806  | 1.521576 | 6.674175  |
| O  | 5.275903  | 3.045983 | 2.370024  |

|    |           |          |           |
|----|-----------|----------|-----------|
| O  | 7.913774  | 0.000000 | 4.523772  |
| O  | 2.637925  | 9.138040 | 4.523772  |
| O  | 8.168946  | 3.244639 | 8.661989  |
| O  | 9.342434  | 0.857805 | 8.785040  |
| O  | 6.594812  | 2.284510 | 4.523772  |
| O  | 3.956887  | 2.284510 | 4.523772  |
| O  | 6.656981  | 1.038746 | 8.917974  |
| O  | -2.456417 | 4.686024 | 10.921931 |
| O  | 0.025700  | 6.034534 | 6.679958  |
| O  | -2.637872 | 7.615002 | 2.370024  |
| O  | 0.000000  | 4.569020 | 4.523772  |
| O  | -0.376454 | 8.192996 | 8.181753  |
| O  | 1.259764  | 6.404540 | 9.037960  |
| O  | -1.318962 | 6.853530 | 4.523772  |
| O  | -3.956887 | 6.853530 | 4.523772  |
| O  | 6.594812  | 6.853530 | 4.523772  |
| O  | -1.398086 | 5.754555 | 8.838947  |
| O  | 5.266628  | 6.092134 | 6.675566  |
| O  | 2.637978  | 7.615002 | 2.370024  |
| O  | 5.275849  | 4.569020 | 4.523772  |
| O  | 4.896570  | 7.470344 | 8.888956  |
| O  | 6.493901  | 5.317676 | 8.854476  |
| O  | 3.956887  | 6.853530 | 4.523772  |
| O  | 1.318963  | 6.853530 | 4.523772  |
| O  | 3.848444  | 5.023310 | 8.704341  |
| Ru | 2.011267  | 4.646044 | 9.246872  |
| H  | 4.688926  | 9.074534 | 11.446683 |



|   |           |           |           |
|---|-----------|-----------|-----------|
| H | -0.906338 | 2.522739  | 2.000066  |
| H | -0.726904 | 8.587405  | 11.173402 |
| H | 4.369512  | 2.522739  | 2.000066  |
| H | 7.416548  | 4.187681  | 11.402337 |
| H | -3.544263 | 7.091758  | 2.000066  |
| H | 1.731587  | 7.091758  | 2.000066  |
| H | 0.881316  | 4.367198  | 10.591825 |
| H | 0.365479  | 4.288532  | 9.925492  |
| O | 4.066584  | 9.995844  | 8.785040  |
| O | 6.725506  | 9.360605  | 8.611572  |
| O | 5.480899  | 9.168478  | 10.896035 |
| O | 4.899395  | -0.945044 | 8.181753  |
| O | 5.354360  | -0.186113 | 10.773777 |
| O | -2.382753 | 3.244639  | 8.661989  |
| O | -4.057798 | 5.317676  | 8.854476  |
| H | -0.586924 | -0.063505 | 11.446683 |
| H | -3.135152 | 4.187681  | 11.402337 |
| H | 4.548945  | -0.550634 | 11.173402 |

74

Ru@SiO2-H2-TS

|    |          |          |          |
|----|----------|----------|----------|
| Si | 5.114773 | 9.030598 | 9.273360 |
| Si | 2.637872 | 1.523037 | 5.062270 |
| Si | 2.368803 | 1.443678 | 8.261452 |
| Si | 0.000053 | 3.045983 | 3.985274 |
| Si | 5.095818 | 0.325932 | 9.186426 |
| Si | 7.913722 | 1.523037 | 5.062270 |

|    |           |          |           |
|----|-----------|----------|-----------|
| Si | 7.884201  | 1.706783 | 8.274128  |
| Si | 5.275903  | 3.045983 | 3.985274  |
| Si | -2.735012 | 4.786014 | 9.272099  |
| Si | -0.000053 | 6.092057 | 5.062270  |
| Si | -0.290319 | 6.620057 | 8.170047  |
| Si | -2.637872 | 7.615002 | 3.985274  |
| Si | 5.275797  | 6.092057 | 5.062270  |
| Si | 4.995225  | 6.001855 | 8.262498  |
| Si | 2.637978  | 7.615002 | 3.985274  |
| O  | 0.143755  | 0.002285 | 10.884528 |
| O  | 2.675236  | 1.510402 | 6.678549  |
| O  | 0.000053  | 3.045983 | 2.370024  |
| O  | 2.637925  | 0.000000 | 4.523772  |
| O  | -2.637925 | 9.138040 | 4.523772  |
| O  | 1.731208  | 2.847671 | 8.778846  |
| O  | 3.762837  | 1.260115 | 9.083447  |
| O  | 1.318962  | 2.284510 | 4.523772  |
| O  | -1.318962 | 2.284510 | 4.523772  |
| O  | 9.232738  | 2.284510 | 4.523772  |
| O  | 1.246862  | 0.290792 | 8.538980  |
| O  | 0.033325  | 8.962936 | 10.733565 |
| O  | 7.921147  | 1.514295 | 6.673834  |
| O  | 5.275903  | 3.045983 | 2.370024  |
| O  | 7.913774  | 0.000000 | 4.523772  |
| O  | 2.637925  | 9.138040 | 4.523772  |
| O  | 8.010244  | 3.295812 | 8.622378  |
| O  | 9.142542  | 0.887950 | 8.908075  |

|    |           |          |           |
|----|-----------|----------|-----------|
| O  | 6.594812  | 2.284510 | 4.523772  |
| O  | 3.956887  | 2.284510 | 4.523772  |
| O  | 6.457920  | 1.132632 | 8.825305  |
| O  | -2.467075 | 4.733316 | 10.893981 |
| O  | 0.020109  | 6.048291 | 6.684160  |
| O  | -2.637872 | 7.615002 | 2.370024  |
| O  | 0.000000  | 4.569020 | 4.523772  |
| O  | -0.503640 | 8.233455 | 8.141680  |
| O  | 1.062151  | 6.420212 | 9.094213  |
| O  | -1.318962 | 6.853530 | 4.523772  |
| O  | -3.956887 | 6.853530 | 4.523772  |
| O  | 6.594812  | 6.853530 | 4.523772  |
| O  | -1.602102 | 5.826976 | 8.721845  |
| O  | 5.314852  | 6.112223 | 6.674615  |
| O  | 2.637978  | 7.615002 | 2.370024  |
| O  | 5.275849  | 4.569020 | 4.523772  |
| O  | 4.741014  | 7.508153 | 8.846936  |
| O  | 6.317703  | 5.337441 | 8.968858  |
| O  | 3.956887  | 6.853530 | 4.523772  |
| O  | 1.318963  | 6.853530 | 4.523772  |
| O  | 3.672500  | 5.090643 | 8.499755  |
| Ru | 1.851322  | 4.678478 | 9.211596  |
| H  | 4.651963  | 9.099406 | 11.475194 |
| H  | -0.906338 | 2.522739 | 2.000066  |
| H  | -0.730806 | 8.554250 | 11.170488 |
| H  | 4.369512  | 2.522739 | 2.000066  |
| H  | 7.450778  | 4.225708 | 11.424039 |

|   |           |           |           |
|---|-----------|-----------|-----------|
| H | -3.544263 | 7.091758  | 2.000066  |
| H | 1.731587  | 7.091758  | 2.000066  |
| H | 1.870388  | 4.539341  | 10.802530 |
| H | 0.691870  | 4.377813  | 10.340631 |
| O | 3.866692  | 10.025990 | 8.908075  |
| O | 6.522712  | 9.428831  | 8.538980  |
| O | 5.419605  | 9.140325  | 10.884528 |
| O | 4.772210  | -0.904585 | 8.141680  |
| O | 5.309175  | -0.175103 | 10.733565 |
| O | -2.541455 | 3.295812  | 8.622378  |
| O | -4.233996 | 5.337441  | 8.968858  |
| H | -0.623887 | -0.038633 | 11.475194 |
| H | -3.100921 | 4.225708  | 11.424039 |
| H | 4.545043  | -0.583790 | 11.170488 |

73

Ru@SiO2-CO2

|    |           |          |          |
|----|-----------|----------|----------|
| Si | -0.232767 | 0.413575 | 9.215633 |
| Si | 2.637872  | 1.523037 | 5.062270 |
| Si | 2.474390  | 1.799931 | 8.240976 |
| Si | 0.000053  | 3.045983 | 3.985274 |
| Si | 5.012016  | 0.306949 | 9.103045 |
| Si | 7.913722  | 1.523037 | 5.062270 |
| Si | 7.666073  | 1.906839 | 8.230589 |
| Si | 5.275903  | 3.045983 | 3.985274 |
| Si | 7.573821  | 4.986397 | 9.170162 |
| Si | -0.000053 | 6.092057 | 5.062270 |

|    |           |          |           |
|----|-----------|----------|-----------|
| Si | -0.469347 | 6.651497 | 8.096396  |
| Si | -2.637872 | 7.615002 | 3.985274  |
| Si | 5.275797  | 6.092057 | 5.062270  |
| Si | 4.991982  | 6.514604 | 8.220888  |
| Si | 2.637978  | 7.615002 | 3.985274  |
| O  | -0.014860 | 0.039832 | 10.793795 |
| O  | 2.683715  | 1.453537 | 6.677736  |
| O  | 0.000053  | 3.045983 | 2.370024  |
| O  | 2.637925  | 0.000000 | 4.523772  |
| O  | -2.637925 | 9.138040 | 4.523772  |
| O  | 2.799544  | 3.401776 | 8.427488  |
| O  | 3.580158  | 1.079923 | 9.187808  |
| O  | 1.318962  | 2.284510 | 4.523772  |
| O  | -1.318962 | 2.284510 | 4.523772  |
| O  | 9.232738  | 2.284510 | 4.523772  |
| O  | 0.956716  | 1.394014 | 8.658379  |
| O  | 0.032157  | 8.798162 | 10.572720 |
| O  | 7.920507  | 1.544620 | 6.674554  |
| O  | 5.275903  | 3.045983 | 2.370024  |
| O  | 7.913774  | 0.000000 | 4.523772  |
| O  | 2.637925  | 9.138040 | 4.523772  |
| O  | 7.666142  | 3.530219 | 8.434644  |
| O  | 8.887527  | 1.190961 | 9.048852  |
| O  | 6.594812  | 2.284510 | 4.523772  |
| O  | 3.956887  | 2.284510 | 4.523772  |
| O  | 6.208288  | 1.327570 | 8.669521  |
| O  | -2.592116 | 4.723816 | 10.737873 |

|    |           |          |           |
|----|-----------|----------|-----------|
| O  | 0.039788  | 6.012231 | 6.689820  |
| O  | -2.637872 | 7.615002 | 2.370024  |
| O  | 0.000000  | 4.569020 | 4.523772  |
| O  | -0.477918 | 8.275064 | 7.959008  |
| O  | 0.637850  | 6.323750 | 9.279133  |
| O  | -1.318962 | 6.853530 | 4.523772  |
| O  | -3.956887 | 6.853530 | 4.523772  |
| O  | 6.594812  | 6.853530 | 4.523772  |
| O  | -1.928961 | 6.027800 | 8.453230  |
| O  | 5.261426  | 6.106641 | 6.678319  |
| O  | 2.637978  | 7.615002 | 2.370024  |
| O  | 5.275849  | 4.569020 | 4.523772  |
| O  | 5.135017  | 8.132471 | 8.405876  |
| O  | 6.087996  | 5.678209 | 9.098056  |
| O  | 3.956887  | 6.853530 | 4.523772  |
| O  | 1.318963  | 6.853530 | 4.523772  |
| O  | 3.450966  | 6.130671 | 8.647627  |
| O  | 0.792204  | 3.780343 | 10.408113 |
| O  | 2.335324  | 4.263713 | 12.130549 |
| Ru | 2.010918  | 4.977262 | 9.109155  |
| H  | -0.297237 | 0.695567 | 11.449759 |
| H  | -0.906338 | 2.522739 | 2.000066  |
| H  | 0.464256  | 7.922637 | 10.541378 |
| H  | 4.369512  | 2.522739 | 2.000066  |
| H  | -2.886229 | 5.385186 | 11.383039 |
| H  | -3.544263 | 7.091758 | 2.000066  |
| H  | 1.731587  | 7.091758 | 2.000066  |

|   |           |           |           |
|---|-----------|-----------|-----------|
| C | 1.748210  | 4.192377  | 11.099545 |
| O | -0.140833 | -1.005569 | 8.405876  |
| O | -1.664173 | 1.190961  | 9.048852  |
| O | 4.797932  | -0.862976 | 7.959008  |
| O | 5.308007  | -0.339877 | 10.572720 |
| O | 8.622739  | 6.027800  | 8.453230  |
| O | 7.959583  | 4.723816  | 10.737873 |
| H | 5.740106  | -1.215402 | 10.541378 |
| H | 7.665470  | 5.385186  | 11.383039 |

76

Ru@SiO<sub>2</sub>-H-CO<sub>2</sub>

|    |           |          |          |
|----|-----------|----------|----------|
| Si | 10.305301 | 0.372783 | 9.188687 |
| Si | 2.637872  | 1.523037 | 5.062270 |
| Si | 2.451345  | 1.847490 | 8.233866 |
| Si | 0.000053  | 3.045983 | 3.985274 |
| Si | 4.989909  | 0.369129 | 9.082150 |
| Si | 7.913722  | 1.523037 | 5.062270 |
| Si | 7.677102  | 1.935262 | 8.223415 |
| Si | 5.275903  | 3.045983 | 3.985274 |
| Si | 7.522222  | 5.043006 | 9.115244 |
| Si | -0.000053 | 6.092057 | 5.062270 |
| Si | -0.521560 | 6.736414 | 8.075017 |
| Si | -2.637872 | 7.615002 | 3.985274 |
| Si | 5.275797  | 6.092057 | 5.062270 |
| Si | 4.917120  | 6.516054 | 8.184742 |
| Si | 2.637979  | 7.615002 | 3.985274 |

O 5.193173 9.065343 10.758425  
O 2.654365 1.453928 6.680225  
O 0.000053 3.045983 2.370024  
O 2.637925 0.000000 4.523772  
O -2.637925 9.138040 4.523772  
O 2.652770 3.466136 8.363524  
O 3.610807 1.224378 9.184717  
O 1.318963 2.284510 4.523772  
O -1.318962 2.284510 4.523772  
O 9.232738 2.284510 4.523772  
O 0.980539 1.357519 8.731531  
O -0.012074 8.834348 10.545048  
O 7.938760 1.557562 6.675110  
O 5.275903 3.045983 2.370024  
O 7.913774 0.000000 4.523772  
O 2.637925 9.138040 4.523772  
O 7.656182 3.562967 8.427085  
O 8.915032 1.248232 9.056538  
O 6.594811 2.284510 4.523772  
O 3.956887 2.284510 4.523772  
O 6.232566 1.340112 8.664576  
O -2.592505 4.804316 10.687956  
O 0.035849 6.052324 6.698512  
O -2.637872 7.615002 2.370024  
O 0.000000 4.569019 4.523772  
O -0.567506 8.360520 7.922078  
O 0.590760 6.474653 9.270148



|    |           |           |           |
|----|-----------|-----------|-----------|
| O  | -1.318962 | 6.853530  | 4.523772  |
| O  | -3.956887 | 6.853530  | 4.523772  |
| O  | 6.594812  | 6.853530  | 4.523772  |
| O  | -1.986546 | 6.090904  | 8.399217  |
| O  | 5.300383  | 6.078029  | 6.670308  |
| O  | 2.637979  | 7.615002  | 2.370024  |
| O  | 5.275849  | 4.569019  | 4.523772  |
| O  | 5.117420  | 8.145391  | 8.313023  |
| O  | 6.021626  | 5.692573  | 9.095911  |
| O  | 3.956887  | 6.853530  | 4.523772  |
| O  | 1.318963  | 6.853530  | 4.523772  |
| O  | 3.362917  | 6.234150  | 8.512498  |
| O  | 0.060161  | 3.866733  | 9.675701  |
| O  | -0.409714 | 2.965986  | 11.794251 |
| Ru | 1.898643  | 5.071154  | 8.994569  |
| H  | 10.104123 | 0.514950  | 11.437623 |
| H  | -0.906338 | 2.522739  | 2.000066  |
| H  | 0.412511  | 7.952667  | 10.467817 |
| H  | 4.369512  | 2.522739  | 2.000066  |
| H  | -2.892728 | 5.473770  | 11.322423 |
| H  | -3.544263 | 7.091758  | 2.000066  |
| H  | 1.731587  | 7.091758  | 2.000066  |
| H  | 2.412704  | 4.916404  | 10.465439 |
| C  | -0.189319 | 3.432397  | 10.746198 |
| O  | 10.393270 | -0.992649 | 8.313023  |
| O  | 10.469023 | -0.072697 | 10.758425 |
| O  | 11.532239 | 1.357519  | 8.731531  |

|   |          |           |           |
|---|----------|-----------|-----------|
| O | 4.708344 | -0.777519 | 7.922078  |
| O | 5.263776 | -0.303692 | 10.545048 |
| O | 8.565153 | 6.090904  | 8.399217  |
| O | 7.959195 | 4.804316  | 10.687956 |
| H | 4.828273 | 9.652990  | 11.437623 |
| H | 5.688361 | -1.185373 | 10.467817 |
| H | 7.658971 | 5.473770  | 11.322423 |

74

Ru@SiO<sub>2</sub>-OCHO

|    |           |          |           |
|----|-----------|----------|-----------|
| Si | -0.163631 | 0.439604 | 9.239785  |
| Si | 2.637872  | 1.523037 | 5.062270  |
| Si | 2.498901  | 1.834838 | 8.210420  |
| Si | 0.000053  | 3.045983 | 3.985274  |
| Si | 5.010657  | 0.307121 | 9.149799  |
| Si | 7.913722  | 1.523037 | 5.062270  |
| Si | 7.693655  | 1.871092 | 8.246655  |
| Si | 5.275903  | 3.045983 | 3.985274  |
| Si | 7.554967  | 4.966870 | 9.174387  |
| Si | -0.000053 | 6.092057 | 5.062270  |
| Si | -0.462766 | 6.596266 | 8.126931  |
| Si | -2.637872 | 7.615002 | 3.985274  |
| Si | 5.275797  | 6.092057 | 5.062270  |
| Si | 5.002287  | 6.537951 | 8.225417  |
| Si | 2.637979  | 7.615002 | 3.985274  |
| O  | 0.097326  | 0.146232 | 10.816525 |
| O  | 2.709370  | 1.409217 | 6.668961  |

O 0.000053 3.045983 2.370024  
O 2.637925 0.000000 4.523772  
O -2.637925 9.138040 4.523772  
O 2.824819 3.459347 8.238628  
O 3.614086 1.145524 9.168196  
O 1.318963 2.284510 4.523772  
O -1.318962 2.284510 4.523772  
O 9.232738 2.284510 4.523772  
O 0.976732 1.453888 8.623677  
O -0.064257 8.864285 10.664342  
O 7.913006 1.551407 6.675124  
O 5.275903 3.045983 2.370024  
O 7.913774 0.000000 4.523772  
O 2.637925 9.138040 4.523772  
O 7.668084 3.492527 8.485500  
O 8.933918 1.169771 9.034086  
O 6.594811 2.284510 4.523772  
O 3.956887 2.284510 4.523772  
O 6.258399 1.255219 8.706339  
O -2.615546 4.780889 10.758379  
O 0.049854 6.022558 6.693349  
O -2.637872 7.615002 2.370024  
O 0.000000 4.569019 4.523772  
O -0.460320 8.222538 8.064451  
O 0.608057 6.163348 9.314614  
O -1.318962 6.853530 4.523772  
O -3.956887 6.853530 4.523772

|    |           |           |           |
|----|-----------|-----------|-----------|
| O  | 6.594812  | 6.853530  | 4.523772  |
| O  | -1.937152 | 5.981844  | 8.439428  |
| O  | 5.260820  | 6.130645  | 6.679549  |
| O  | 2.637979  | 7.615002  | 2.370024  |
| O  | 5.275849  | 4.569019  | 4.523772  |
| O  | 5.203097  | 8.141208  | 8.450180  |
| O  | 6.066117  | 5.641838  | 9.089345  |
| O  | 3.956887  | 6.853530  | 4.523772  |
| O  | 1.318963  | 6.853530  | 4.523772  |
| O  | 3.450385  | 6.195636  | 8.659127  |
| O  | 1.368771  | 3.686630  | 10.513960 |
| O  | -0.076286 | 2.765466  | 11.948012 |
| Ru | 2.104735  | 4.933052  | 9.192619  |
| H  | 0.125400  | 0.950080  | 11.384785 |
| H  | -0.906338 | 2.522739  | 2.000066  |
| H  | 0.536331  | 8.105361  | 10.749413 |
| H  | 4.369512  | 2.522739  | 2.000066  |
| H  | -3.027526 | 5.401226  | 11.379213 |
| H  | -3.544263 | 7.091758  | 2.000066  |
| H  | 1.731587  | 7.091758  | 2.000066  |
| H  | -0.250454 | 4.703522  | 11.305799 |
| C  | 0.285047  | 3.736516  | 11.301958 |
| O  | -0.072752 | -0.996832 | 8.450180  |
| O  | -1.617782 | 1.169771  | 9.034086  |
| O  | 4.815530  | -0.915502 | 8.064451  |
| O  | 5.211593  | -0.273754 | 10.664342 |
| O  | 8.614548  | 5.981844  | 8.439428  |

|   |          |           |           |
|---|----------|-----------|-----------|
| O | 7.936153 | 4.780889  | 10.758379 |
| H | 5.812181 | -1.032679 | 10.749413 |
| H | 7.524174 | 5.401226  | 11.379213 |

76

Ru@SiO<sub>2</sub>-OCHO-TS

|    |           |          |           |
|----|-----------|----------|-----------|
| Si | 10.284225 | 0.355782 | 9.251226  |
| Si | 2.637872  | 1.523037 | 5.062270  |
| Si | 2.413660  | 1.779647 | 8.227621  |
| Si | 0.000053  | 3.045983 | 3.985274  |
| Si | 4.971225  | 0.333871 | 9.112335  |
| Si | 7.913722  | 1.523037 | 5.062270  |
| Si | 7.664051  | 1.875564 | 8.234764  |
| Si | 5.275903  | 3.045983 | 3.985274  |
| Si | 7.580549  | 4.949054 | 9.186029  |
| Si | -0.000053 | 6.092057 | 5.062270  |
| Si | -0.496109 | 6.655659 | 8.092838  |
| Si | -2.637872 | 7.615002 | 3.985274  |
| Si | 5.275797  | 6.092057 | 5.062270  |
| Si | 4.966433  | 6.445291 | 8.243805  |
| Si | 2.637979  | 7.615002 | 3.985274  |
| O  | -0.026406 | 0.070356 | 10.840887 |
| O  | 2.684749  | 1.451521 | 6.674729  |
| O  | 0.000053  | 3.045983 | 2.370024  |
| O  | 2.637925  | 0.000000 | 4.523772  |
| O  | -2.637925 | 9.138040 | 4.523772  |
| O  | 2.624288  | 3.408479 | 8.413042  |

O 3.570625 1.163353 9.184642  
O 1.318963 2.284510 4.523772  
O -1.318962 2.284510 4.523772  
O 9.232738 2.284510 4.523772  
O 0.933429 1.279871 8.627039  
O -0.057147 8.855177 10.604522  
O 7.920828 1.540394 6.673370  
O 5.275903 3.045983 2.370024  
O 7.913774 0.000000 4.523772  
O 2.637925 9.138040 4.523772  
O 7.669931 3.492481 8.460408  
O 8.856228 1.127208 9.054944  
O 6.594811 2.284510 4.523772  
O 3.956887 2.284510 4.523772  
O 6.197827 1.298501 8.653997  
O -2.584303 4.727709 10.760457  
O 0.030814 6.041493 6.688880  
O -2.637872 7.615002 2.370024  
O 0.000000 4.569019 4.523772  
O -0.549984 8.279493 7.998155  
O 0.659409 6.371719 9.259488  
O -1.318962 6.853530 4.523772  
O -3.956887 6.853530 4.523772  
O 6.594812 6.853530 4.523772  
O -1.926574 5.992999 8.464429  
O 5.256808 6.108293 6.681980  
O 2.637979 7.615002 2.370024

|    |           |           |           |
|----|-----------|-----------|-----------|
| O  | 5.275849  | 4.569019  | 4.523772  |
| O  | 5.064582  | 8.055965  | 8.483384  |
| O  | 6.089475  | 5.618924  | 9.097079  |
| O  | 3.956887  | 6.853530  | 4.523772  |
| O  | 1.318963  | 6.853530  | 4.523772  |
| O  | 3.459928  | 6.000433  | 8.687035  |
| O  | 0.226945  | 3.792772  | 9.690249  |
| O  | 0.323366  | 3.173590  | 11.917592 |
| Ru | 1.930234  | 4.967417  | 9.169420  |
| H  | -0.087658 | 0.838659  | 11.436327 |
| H  | -0.906338 | 2.522739  | 2.000066  |
| H  | 0.488065  | 8.049258  | 10.632648 |
| H  | 4.369512  | 2.522739  | 2.000066  |
| H  | -2.937281 | 5.369148  | 11.395822 |
| H  | -3.544263 | 7.091758  | 2.000066  |
| H  | 1.731587  | 7.091758  | 2.000066  |
| H  | 1.512317  | 4.622127  | 11.040078 |
| C  | 0.595623  | 3.793514  | 10.910805 |
| O  | 10.340432 | -1.082074 | 8.483384  |
| O  | 11.485128 | 1.279871  | 8.627039  |
| O  | 10.525293 | 0.070356  | 10.840887 |
| O  | 4.725866  | -0.858546 | 7.998155  |
| O  | 5.218703  | -0.282863 | 10.604522 |
| O  | 8.625126  | 5.992999  | 8.464429  |
| O  | 7.967397  | 4.727709  | 10.760457 |
| H  | 10.464042 | 0.838659  | 11.436327 |
| H  | 5.763915  | -1.088781 | 10.632648 |

H 7.614418 5.369148 11.395822

177

Ru@SiO2-H-OH-water

|    |               |               |               |
|----|---------------|---------------|---------------|
| Si | 5.7036355953  | 9.4792967452  | 8.8870257910  |
| Si | 2.6380000000  | 1.5230000000  | 4.9910000000  |
| Si | 3.0153226682  | 1.7408000636  | 8.1684330404  |
| Si | 0.0000000000  | 3.0460000000  | 3.9290000000  |
| Si | 0.5066297660  | 9.4761391346  | 9.0823450961  |
| Si | 7.9140000000  | 1.5230000000  | 4.9910000000  |
| Si | 8.3345399039  | 1.9468008784  | 8.1278208214  |
| Si | 5.2760000000  | 3.0460000000  | 3.9290000000  |
| Si | -2.2649014523 | 5.0726170175  | 9.0194999825  |
| Si | 0.0000000000  | 6.0920000000  | 4.9910000000  |
| Si | 0.3857576624  | 6.4146795785  | 8.1329133568  |
| Si | -2.6380000000 | 7.6150000000  | 3.9290000000  |
| Si | 5.2760000000  | 6.0920000000  | 4.9910000000  |
| Si | 5.8131285019  | 6.7022073303  | 7.9797181833  |
| Si | 2.6380000000  | 7.6150000000  | 3.9290000000  |
| O  | -5.2775986333 | 8.8792544045  | 10.3589181991 |
| O  | 2.6270701399  | 1.4775629815  | 6.6084409832  |
| O  | 0.0000000000  | 3.0460000000  | 2.3370000000  |
| O  | 2.6380000000  | 0.0000000000  | 4.4600000000  |
| O  | 2.7585477173  | 3.2884781593  | 8.5353450609  |
| O  | -0.7237081865 | 10.3181121042 | 8.4158696391  |
| O  | 1.3190000000  | 2.2850000000  | 4.4600000000  |
| O  | -1.3190000000 | 2.2850000000  | 4.4600000000  |



|   |               |              |               |
|---|---------------|--------------|---------------|
| O | 1.9341022640  | 0.9347185259 | 9.1108404026  |
| O | 0.0878783648  | 9.2453729020 | 10.6569608125 |
| O | 7.9135235374  | 1.5428791769 | 6.6110789460  |
| O | 5.2760000000  | 3.0460000000 | 2.3370000000  |
| O | 7.9140000000  | 0.0000000000 | 4.4600000000  |
| O | 8.3173472235  | 3.5765862737 | 8.3272636549  |
| O | 9.8759249290  | 1.4800049595 | 8.4434322761  |
| O | 6.5950000000  | 2.2850000000 | 4.4600000000  |
| O | 3.9570000000  | 2.2850000000 | 4.4600000000  |
| O | 7.2062549895  | 1.1720623269 | 9.0538261805  |
| O | -2.9155802911 | 4.9595749737 | 10.5287613493 |
| O | -0.0926118827 | 6.1051291125 | 6.6133199988  |
| O | -2.6380000000 | 7.6150000000 | 2.3370000000  |
| O | 0.0000000000  | 4.5690000000 | 4.4600000000  |
| O | 0.6858516225  | 7.9982522891 | 8.3699849270  |
| O | 1.8103922296  | 5.5911276979 | 8.3583823389  |
| O | -1.3190000000 | 6.8540000000 | 4.4600000000  |
| O | -3.9570000000 | 6.8540000000 | 4.4600000000  |
| O | -0.7587244223 | 5.7470926398 | 9.1116161693  |
| O | 5.2163310503  | 6.0021559477 | 6.6229786131  |
| O | 2.6380000000  | 7.6150000000 | 2.3370000000  |
| O | 5.2760000000  | 4.5690000000 | 4.4600000000  |
| O | 5.8450280529  | 8.3275656223 | 7.7223791885  |
| O | 7.3394321042  | 6.0876942574 | 8.1668614764  |
| O | 3.9570000000  | 6.8540000000 | 4.4600000000  |
| O | 1.3190000000  | 6.8540000000 | 4.4600000000  |
| O | 4.8647153697  | 6.4787045936 | 9.2740139789  |

|   |               |               |               |
|---|---------------|---------------|---------------|
| O | 6.0179946202  | 4.4984629439  | 24.1749809704 |
| O | 4.6986182359  | 3.6305559802  | 21.9263262324 |
| O | 6.1833854620  | -0.0669005835 | 19.5841832661 |
| O | 8.0207041854  | -2.2608969863 | 15.5710282123 |
| O | 6.1151784557  | 1.2782828955  | 22.1252692588 |
| O | 6.4057892277  | 2.5670647644  | 18.5112566115 |
| O | 5.2782037310  | 3.7427235183  | 10.0697429719 |
| O | 0.6563488484  | 3.6516219833  | 13.0203585292 |
| O | 5.2355247088  | 5.8713201611  | 15.8640805113 |
| O | 8.6952261581  | 2.3449402144  | 17.0343129312 |
| O | 0.1583825102  | 4.5120048593  | 23.9774470085 |
| O | 1.5644082854  | 5.1616003010  | 19.4541176483 |
| O | -1.6994946144 | 8.3558342388  | 13.7645716406 |
| O | 1.9204578210  | 3.7794855324  | 21.8421099214 |
| O | -2.8290513591 | 5.9231547090  | 14.6595840036 |
| O | 4.5094299284  | -2.6347543868 | 19.2169218190 |
| O | 2.8752927882  | -3.1462550466 | 21.4778557025 |
| O | 0.3023590112  | 6.8460105949  | 1.2612446114  |
| O | -0.8692079194 | 9.0516884631  | 23.8192139996 |
| O | 1.0767648069  | 4.6995826923  | 15.4819326982 |
| O | 1.7458025823  | 1.0600110295  | 12.3321172445 |
| O | 3.2918255346  | 1.8554678258  | 1.2851472777  |
| O | 4.5474410802  | 3.2839804303  | 16.6551006724 |
| O | 1.9532207874  | 3.2151755445  | 17.5969106375 |
| O | -2.1016802927 | 3.8453744589  | 12.8773700803 |
| O | -3.3716012359 | 8.1762859715  | 22.8504219814 |
| O | 7.5413274271  | 1.6107857835  | 14.3753293447 |

|    |               |               |               |
|----|---------------|---------------|---------------|
| O  | 4.7709137524  | 1.6437875864  | 14.5061069758 |
| O  | 8.7801269878  | 2.5012256484  | 22.2705316020 |
| O  | 1.0207830030  | 8.1225282429  | 12.9215595666 |
| O  | -1.3302959751 | 5.0713445080  | 16.8010807921 |
| O  | 4.2237820341  | 2.1259295545  | 11.9080357909 |
| O  | 8.3368595095  | 1.7933858573  | 1.4510924318  |
| O  | 0.5383387309  | 1.3786247523  | 21.3101301829 |
| O  | -4.4546729214 | 4.9903082228  | 19.9563259694 |
| O  | 2.8035587009  | 7.4062875990  | 18.4035312049 |
| O  | 0.3460804816  | 1.0498905101  | 18.5039405103 |
| O  | 5.5001001739  | 7.2138598415  | 18.2769322297 |
| O  | 5.7887904748  | 6.8703171330  | 1.0810711523  |
| Ru | 3.7166268275  | 4.8251557762  | 9.3046040932  |
| H  | 4.9886257709  | 7.9264039499  | 10.2572896320 |
| H  | -0.9060000000 | 2.5230000000  | 1.9720000000  |
| H  | 0.6210499960  | 8.7025121905  | 11.3029443850 |
| H  | 4.3700000000  | 2.5230000000  | 1.9720000000  |
| H  | -2.4989609003 | 4.4637411603  | 11.2894024906 |
| H  | -3.5440000000 | 7.0920000000  | 1.9720000000  |
| H  | 1.7320000000  | 7.0920000000  | 1.9720000000  |
| H  | 5.4621235671  | 4.2159276447  | 23.3995875372 |
| H  | 5.7320764617  | 3.9436858370  | 24.9456462833 |
| H  | 5.0471749876  | 4.1890078028  | 21.1803532165 |
| H  | 3.7022836508  | 3.6700646453  | 21.8968456404 |
| H  | 6.9741626881  | -0.5564337001 | 19.2302649944 |
| H  | 5.4539921736  | -0.7114108769 | 19.4556608330 |
| H  | 7.8150203368  | -1.7029931941 | 14.7977474465 |

|   |               |               |               |
|---|---------------|---------------|---------------|
| H | 8.9754168654  | -2.5512372018 | 15.4843312782 |
| H | 5.5660837791  | 2.0946637348  | 21.9552091699 |
| H | 6.1518244350  | 0.7875992944  | 21.2678163461 |
| H | 6.2061194643  | 1.6752799382  | 18.8911848363 |
| H | 5.6903693299  | 2.7477483668  | 17.8350094144 |
| H | 4.9108759180  | 3.2250436428  | 10.8485296002 |
| H | 6.0648185803  | 4.2843891790  | 10.3683828639 |
| H | 3.0313114959  | 5.0918483901  | 10.6740638389 |
| H | 0.8865486546  | 4.0484009685  | 13.9148907888 |
| H | 6.0735511681  | 5.8647710612  | 15.3192706806 |
| H | 5.0379459564  | 4.9258157951  | 16.1072361397 |
| H | 7.8899662473  | 2.3531802041  | 17.6255156855 |
| H | 9.3901586304  | 1.8540759565  | 17.5357330347 |
| H | 0.3242217070  | 3.9348105495  | 24.7614992165 |
| H | 0.8476377197  | 4.2913970355  | 23.2988395760 |
| H | 0.6535798521  | 5.5832202740  | 19.4174513380 |
| H | 2.1495528915  | 5.9090530357  | 19.1519404234 |
| H | -2.1294289190 | 7.5192357081  | 14.0899991985 |
| H | -2.3835129345 | 8.8225679711  | 13.2313237750 |
| H | 1.5133687874  | 2.8991247790  | 21.6270520598 |
| H | 1.7732814531  | 4.3339639739  | 21.0285533944 |
| H | -2.3069298031 | 5.6321896357  | 15.4629294581 |
| H | -2.6218363611 | 5.2271654126  | 13.9798163558 |
| H | 3.8912059835  | -2.8094046016 | 19.9685294656 |
| H | 4.1329028250  | -3.0724112834 | 18.4113661431 |
| H | 2.5140640160  | -2.3763272729 | 22.0109385715 |
| H | 3.2355761377  | -3.7838795692 | 22.1219979932 |

|   |               |              |               |
|---|---------------|--------------|---------------|
| H | 0.2583556862  | 5.9850079458 | 0.7275624304  |
| H | -0.4794990126 | 6.8308346427 | 1.8530364754  |
| H | -0.2088881542 | 9.4932200627 | 23.2098205777 |
| H | -0.3902209715 | 8.3184118355 | 24.2780018502 |
| H | 1.6973672943  | 5.4804616909 | 15.4910947624 |
| H | 1.4247887380  | 4.0726142003 | 16.1778904628 |
| H | 1.1760301794  | 0.6164545459 | 11.6597872375 |
| H | 1.2333076766  | 1.8357857656 | 12.6583835082 |
| H | 3.6841608285  | 1.0582288540 | 0.8143061181  |
| H | 2.5794439200  | 1.5221615063 | 1.8582463237  |
| H | 4.5447250510  | 2.6824290792 | 15.8570416009 |
| H | 3.6300908550  | 3.2207760542 | 17.0392440679 |
| H | 1.7759527852  | 3.8853118515 | 18.3229270358 |
| H | 1.4809968107  | 2.3844373307 | 17.8633103601 |
| H | -1.1111498574 | 3.7568750243 | 12.9229856352 |
| H | -2.4550128983 | 3.0158101199 | 13.2994491211 |
| H | -2.5183632515 | 8.5204699093 | 23.2246607837 |
| H | -3.8921850549 | 7.8624356195 | 23.6276580751 |
| H | 7.9744830457  | 1.7381336667 | 15.2524504226 |
| H | 6.5670653939  | 1.6701586167 | 14.5501687004 |
| H | 4.5642455783  | 1.9523322005 | 13.5716131830 |
| H | 4.3344325583  | 0.7567470270 | 14.5416077530 |
| H | 8.9523865347  | 2.8475718173 | 23.1651446639 |
| H | 7.9011638045  | 2.0531924414 | 22.3304396125 |
| H | 0.0756530088  | 8.1295417409 | 13.2252678177 |
| H | 1.4182429021  | 8.9295898290 | 13.3060856331 |
| H | -1.5279245704 | 4.1015024245 | 16.9367533588 |

|   |               |              |               |
|---|---------------|--------------|---------------|
| H | -0.4479333977 | 5.0512769832 | 16.3398315846 |
| H | 4.6605952962  | 1.3308239146 | 11.4740470503 |
| H | 3.2558114068  | 1.8846202164 | 11.8675001116 |
| H | 8.2583418287  | 0.8448354837 | 1.6843476621  |
| H | 7.4925246711  | 2.1968169928 | 1.7407385654  |
| H | -0.3403892772 | 1.6461962771 | 21.7069899094 |
| H | 0.8739350942  | 0.6115103525 | 21.8261138695 |
| H | -3.6738961604 | 5.2536074517 | 20.5151264678 |
| H | -4.2021354179 | 4.1601674652 | 19.4772402945 |
| H | 3.8062781423  | 7.3969136643 | 18.4625054969 |
| H | 2.6366098514  | 7.3634161023 | 17.4322230668 |
| H | 0.4460257747  | 0.0827283751 | 18.3471140786 |
| H | 0.3700425195  | 1.1368256854 | 19.4936409088 |
| H | 5.7738213216  | 6.4911524427 | 18.8999188914 |
| H | 5.5211887903  | 6.7714844024 | 17.3847937108 |
| H | 5.7862379698  | 5.9132672407 | 0.6915374516  |
| H | 4.9149057257  | 7.0253685245 | 1.4907507461  |
| H | 1.0783703014  | 4.2274394821 | 12.3576376515 |
| H | 1.6949965691  | 4.6151878179 | 8.1665694075  |

73

Pt@SiO<sub>2</sub>-H-OH

|    |           |          |          |
|----|-----------|----------|----------|
| Si | -0.174291 | 0.385927 | 9.193502 |
| Si | 2.637872  | 1.523037 | 5.062270 |
| Si | 2.528964  | 1.767466 | 8.275928 |
| Si | 0.000053  | 3.045983 | 3.985274 |
| Si | 5.095476  | 0.309943 | 9.049096 |

|    |           |          |           |
|----|-----------|----------|-----------|
| Si | 7.913722  | 1.523037 | 5.062270  |
| Si | 7.735525  | 1.935583 | 8.234064  |
| Si | 5.275903  | 3.045983 | 3.985274  |
| Si | 7.607517  | 5.042903 | 9.164884  |
| Si | -0.000053 | 6.092057 | 5.062270  |
| Si | -0.448069 | 6.663889 | 8.049371  |
| Si | -2.637872 | 7.615002 | 3.985274  |
| Si | 5.275797  | 6.092057 | 5.062270  |
| Si | 4.960532  | 6.523896 | 8.225551  |
| Si | 2.637978  | 7.615002 | 3.985274  |
| O  | 0.039400  | 0.067883 | 10.791286 |
| O  | 2.681408  | 1.473643 | 6.689567  |
| O  | 0.000053  | 3.045983 | 2.370024  |
| O  | 2.637925  | 0.000000 | 4.523772  |
| O  | -2.637925 | 9.138040 | 4.523772  |
| O  | 3.070800  | 3.287734 | 8.612231  |
| O  | 3.599363  | 0.903379 | 9.177353  |
| O  | 1.318962  | 2.284510 | 4.523772  |
| O  | -1.318962 | 2.284510 | 4.523772  |
| O  | 9.232738  | 2.284510 | 4.523772  |
| O  | 1.023535  | 1.408944 | 8.755861  |
| O  | 0.242810  | 8.702649 | 10.478349 |
| O  | 7.914801  | 1.568053 | 6.675138  |
| O  | 5.275903  | 3.045983 | 2.370024  |
| O  | 7.913774  | 0.000000 | 4.523772  |
| O  | 2.637925  | 9.138040 | 4.523772  |
| O  | 7.713138  | 3.554152 | 8.472777  |

|    |           |          |           |
|----|-----------|----------|-----------|
| O  | 8.950861  | 1.194305 | 9.025177  |
| O  | 6.594812  | 2.284510 | 4.523772  |
| O  | 3.956887  | 2.284510 | 4.523772  |
| O  | 6.275744  | 1.358106 | 8.721573  |
| O  | -2.448698 | 4.962075 | 10.728045 |
| O  | 0.035951  | 5.993060 | 6.680152  |
| O  | -2.637872 | 7.615002 | 2.370024  |
| O  | 0.000000  | 4.569020 | 4.523772  |
| O  | -0.301433 | 8.276200 | 7.904799  |
| O  | 0.664650  | 6.309315 | 9.279656  |
| O  | -1.318962 | 6.853530 | 4.523772  |
| O  | -3.956887 | 6.853530 | 4.523772  |
| O  | 6.594812  | 6.853530 | 4.523772  |
| O  | -1.893777 | 6.097018 | 8.462132  |
| O  | 5.238675  | 6.084038 | 6.675307  |
| O  | 2.637978  | 7.615002 | 2.370024  |
| O  | 5.275849  | 4.569020 | 4.523772  |
| O  | 5.218286  | 8.164864 | 8.302550  |
| O  | 6.136048  | 5.707889 | 9.065171  |
| O  | 3.956887  | 6.853530 | 4.523772  |
| O  | 1.318963  | 6.853530 | 4.523772  |
| O  | 3.509951  | 6.234759 | 8.833583  |
| Pt | 1.970597  | 4.802866 | 8.883070  |
| H  | 0.722986  | 3.862241 | 8.859281  |
| H  | 4.901408  | 8.393409 | 11.122063 |
| H  | -0.906338 | 2.522739 | 2.000066  |
| H  | -0.474186 | 8.566547 | 11.119855 |



|   |           |           |           |
|---|-----------|-----------|-----------|
| H | 4.369512  | 2.522739  | 2.000066  |
| H | 7.759851  | 4.243676  | 11.279280 |
| H | -3.544263 | 7.091758  | 2.000066  |
| H | 1.731587  | 7.091758  | 2.000066  |
| H | 0.909999  | 7.079450  | 9.855160  |
| O | -0.057564 | -0.973176 | 8.302550  |
| O | -1.600839 | 1.194305  | 9.025177  |
| O | 4.974417  | -0.861839 | 7.904799  |
| O | 5.518660  | -0.435390 | 10.478349 |
| O | 8.103002  | 4.962075  | 10.728045 |
| O | 8.657923  | 6.097018  | 8.462132  |
| H | -0.374442 | -0.744631 | 11.122063 |
| H | -2.791849 | 4.243676  | 11.279280 |
| H | 4.801664  | -0.571492 | 11.119855 |
